# Supplementary material for: Reconstruction of Holocene and Last Interglacial vegetation dynamics and wildfire activity in southern Siberia
Source: Copernicus journal article supplement (doi:10.5194/cp-21-661-2025), 2025-03-20
Supplement: Supplementary file 1 [file cp-21-661-2025-supplement.zip]

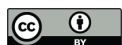

## *Supplement of*

# **Reconstruction of Holocene and Last Interglacial vegetation dynamics and wildfire activity in southern Siberia**

**Jade Margerum et al.**

*Correspondence to:* Jade Margerum ([jade.margerum@northumbria.ac.uk](mailto:jade.margerum@northumbria.ac.uk))

- [cp-21-661-2025-supplement-title-page.pdf](#)
- [Supplements\\_240125.xlsx](#)

The copyright of individual parts of the supplement might differ from the article licence.
