# Supplementary material for: Reconstruction of Holocene and Last Interglacial vegetation dynamics and wildfire activity in southern Siberia
Source: Copernicus journal article supplement (doi:10.5194/cp-21-661-2025), 2025-03-20
Supplement: Supplementary file 1 [file cp-21-661-2025-supplement.zip]

## Sheet: Table S1
Table S1.1: Date input for Copra age model of sample SB_pk7497-1. Top and bottom ages (at 2.5, 69, 73, and 112 mm) were taken from Vaks et al. 2013a, where all other dates were taken from Vaks et al. 2020b.
Please see these publications and supplementary infromation therein for addtional information relating to these dates and the methods involved.
a Vaks, A., Gutareva, O. S., Breitenbach, S. F. M., Avirmed, E., Mason, A. J., Thomas, A. L., Osinzev, A. V., Kononov, A. M., and Henderson, G. M.: Speleothems reveal 500,000-year history of Siberian permafrost, Science, 340, 183–186, https://doi.org/10.1126/science.1228729, 2013.
b Vaks, A., Mason, A. J., Breitenbach, S. F. M., Kononov, A. M., Osinzev, A. V., Rosensaft, M., Borshevsky, A., Gutareva, O. S., and Henderson, G. M.: Palaeoclimate evidence of vulnerable permafrost during times of low sea ice, Nature, 577, 221– 225, https://doi.org/10.1038/s41586-019-1880-1, 2020.
depth from top (mm)	yrs BP	1s error (yrs)
0	-58	1	(Dummy age - this is not a real age and only used for age model to ensure the top of the speleothem was incorporated into the age model)
2.5	460.4	1
18.3	4527.1	19.2
36.4	6662.2	27.9
54	8401.7	34.9
69	9874.4	17
**Hiatus**
73	118830	260
112	122710	320
Table S1.2: U-Th chronology of speleothems from Botovskaya cave (Vaks et al., 2013, 2020)
Sample	Mineral	238U (ppm)	230Th (ppt)	232Th (ppb)	(230Th/232Th)	(232Th/238U)	2s	(230Th/238U)	2s	(234U/238U)	2s	Raw Age (ka before 2013-2014 A.D.)	2s	(230Th/238U) corr.	2s	(230Th/234U) corr.	2s	(234U/238U) corr.	2s	(234U/238U) initial*	Age corr. (ka before 2013-2014 A.D.)	2s	Age (ka before 1950 A.D.)	2s
SB_pk7497-1-C	Aragonite	132.395	314.966	0.510287	136756	1.26196e-06	1.76125e-07	0.14536	0.00114821	3.51091	0.00113508	4.59016	0.0383658	0.145359	0.00114821	0.0414021	0.000340426	3.51092	0.00113508	3.5437	4.59013	0.0383658	4.52713	0.0383658
SB_pk7497-1-Eb	Aragonite	109.892	393.484	0.562215	73490.9	1.6751e-06	2.33775e-07	0.218784	0.00170589	3.6338	0.00113508	6.72523	0.05586	0.218783	0.00170589	0.0602076	0.000488257	3.6338	0.00113509	3.68434	6.72523	0.05586	6.66223	0.05586
SB_pk-7497-1-G	Aragonite	136.664	615.238	0.676614	127456	1.62103e-06	2.26219e-07	0.27507	0.00211494	3.65206	0.00113508	8.46478	0.0697867	0.275069	0.00211494	0.0753188	0.000602517	3.65207	0.00113508	3.71628	8.46474	0.0697867	8.40174	0.0697867
SB-pk7497-1-A1	Aragonite	94.09	94.09	6.14	746	2.14e-05	1.61e-07	0.01662	5e-05	3.47526	0.0007	0.521	0.002	0.0166	5e-05			3.4753	0.0007	3.4789	0.52	0.002	0.46	0.002
SB_pk7497-1-I	Aragonite	158.12	159.12	0.13	385301	2.68e-07	9e-10	0.32416	0.00109	3.6757	0.0007	9.93	0.03	0.32416	0.00109			3.6757	0.0007	3.7519	9.934	0.035	9.874	0.035
SB_pk-p7497-1-J	Aragonite	88.34	88.34	1.38	509387	5.1e-06	1.4e-08	2.01878	0.00554	2.76532	0.0007	118.89	0.52	2.01878	0.00554			2.76532	0.0007	3.4703	118.89	0.52	118.83	0.52
SB-pk7497-1-O	Aragonite	35.96	35.96	1.51	134890	1.37e-05	4.4e-08	2.0876	0.00668	2.80083	0.0007	122.77	0.637	2.08761	0.00668			2.80085	0.0007	3.5478	122.77	0.64	122.71	0.64

## Sheet: Table S2
Table S2: δ13C input for Copra age model of sample SB_pk7497-1. All samples were taken from SB_pk7497-1.
Each δ13C measurement was corrected for minerology - please see tab 'minerology correction' for the minerology of each value and which correction was applied.
Distance from top (mm)	Combined δ13C profile (Ar and Cc, both on aragonite scale), permil VPDB
1	-0.283092
2	-0.127692
3	-0.291873
4	-0.349005
5	-0.705233
6	-0.174807
7	-2.26396
8	-1.29206
11	-0.305545
12	-0.103756
13	-0.332588
14	-0.245101
15	0.0476635
16	-0.728936
18	-1.342
19	-1.55131
20	-1.08213
21	-1.08335
22	-0.783605
24	-0.96168
25	-0.809046
26	-0.617371
27	-0.502157
29	-0.315479
31	-0.358797
32	-0.417912
33	-0.556693
34	-0.143221
35	-0.373979
36	-0.357303
37	-0.383896
38	0.253647
39	0.69
40	0.753366
41	0.70782
42	0.294864
43	0.0951636
44	0.375649
45	0.352736
46	0.1625
47	0.458176
48	0.535031
49	0.696285
50	1.28082
51	0.0810456
52	0.614609
53	0.744059
54	0.905372
55	0.783836
56	0.61682
57	0.666308
58	1.19799
59	1.29554
60	0.679492
61	1.15463
62	1.06097
63	1.23108
64	1.35679
66	0.76245
67	0.991914
68	0.94313
69	0.953076
70	0.970067
71	0.455809
72	0.17807
77	-1.88621
78	-3.08473
79	-1.21253
81	-0.859451
82	-2.77764
83	-0.967851
85	-0.769313
87	-0.625411
88	-0.919886
89	-0.900991
90	-0.597805
92	-1.86261
95	-0.959231
97	-1.38389
98	-1.28714
99	-1.33218
100	-1.13082
103	-1.18371
105	-1.28138
107	-1.12635
112	-1.28769
113	-1.59587
114	-1.52547
115	-1.88227
116	-2.11632
117	-3.01474
118	-2.98434
119	-3.70249
120	-2.83298

## Sheet: Table S3
Table S3: Lev input for Copra age model of sample SB_pk7497-1.
Levoglucosan sampling required large quanties of material which spanned across multiple mms of SB_pk7497-1.
Where this occurred, the top and bottom (i.e., 2 and 7) mm of this sample were given the same value, hence why values are repeated multiple times through this dataset.
Distance from top (mm)	Levoglucosan
2	1.56113
7	1.56113
8	1.16016
10	1.16016
11	1.25919
13	1.25919
14	1.32401
15	1.32401
16	1.93268
19	1.93268
20	1.20544
22	1.20544
24	1.8708
25	1.8708
26	1.7073
27	1.7073
29	1.78022
31	1.78022
32	1.61378
34	1.61378
35	1.51321
37	1.51321
38	1.73491
40	1.73491
41	1.8472
43	1.8472
44	2.00397
46	2.00397
47	1.94954
49	1.94954
50	2.02598
52	2.02598
53	1.95683
55	1.95683
56	1.72667
58	1.72667
59	2.04301
61	2.04301
62	2.06588
71	2.06588
73	8.84703
76	8.84703
77	5.7525
79	5.7525
80	6.14968
81	6.14968
82	5.33786
83	5.33786
84	4.79998
85	4.79998
86	3.94286
87	3.94286
88	5.94858
89	5.94858
90	3.83814
91	3.83814
92	8.63615
93	8.63615
94	5.67036
95	5.67036
96	5.97822
97	5.97822
98	5.59558
99	5.59558
100	6.37723
101	6.37723
102	5.13337
103	5.13337
104	9.68242
105	9.68242
106	5.53851
107	5.53851
108	5.60607
109	5.60607
110	4.7024
111	4.7024
112	5.31966
113	5.31966
114	5.58813

## Sheet: Table S4
Table S4: Syringyl (S)/ Vanillyl (V) input for Copra age model of sample SB_pk7497-1.
S/V sampling required large quanties of material which spanned across multiple mms of SB_pk7497-1.
Where this occurred, the top and bottom (i.e., 2 and 10.9) mm of this sample were given the same value, hence why values are repeated multiple times through this dataset.
Distance from top (mm)	Lig SV
2	0.65919
10.9	0.65919
11	1.00337
16.9	1.00337
17	0.533427
22.9	0.533427
23	1.12466
28.9	1.12466
29	1.13912
34.9	1.13912
35	0.902583
40.9	0.902583
41	0.61349
46.9	0.61349
47	0.947615
52.9	0.947615
53	0.589309
58.9	0.589309
59	0.733136
65	0.733136
73	0.706863
79	0.706863
79.1	0.629204
84	0.629204
84.1	1.65971
87	1.65971
87.1	0.839661
91	0.839661
91.1	1.74761
95	1.74761
95.1	0.534478
99	0.534478
99.1	1.30837
103	1.30837
103.1	0.677653
107	0.677653
107.1	1.13472
111	1.13472
111.1	1.2854
128	1.2854

## Sheet: Table S5
Table S5: Cinnamyl (C)/ Vanillyl (V) input for Copra age model of sample SB_pk7497-1.
C/V sampling required large quanties of material which spanned across multiple mms of SB_pk7497-1.
Where this occurred, the top and bottom (i.e., 2 and 10.9) mm of this sample were given the same value, hence why values are repeated multiple times through this dataset.
Distance from top (mm)	Lig CV
2	0.0939483
10.9	0.0939483
11	0.121517
16.9	0.121517
17	0.0994288
22.9	0.0994288
23	0.136456
28.9	0.136456
29	0.18818
34.9	0.18818
35	0.128618
40.9	0.128618
41	0.137069
46.9	0.137069
47	0.18535
52.9	0.18535
53	0.138681
58.9	0.138681
59	0.154834
65	0.154834
73	0.24241
79	0.24241
79.1	0.287985
84	0.287985
84.1	1.00336
87	1.00336
87.1	0.277891
91	0.277891
91.1	0.29754
95	0.29754
95.1	0.128695
99	0.128695
99.1	0.724668
103	0.724668
103.1	0.950577
107	0.950577
107.1	0.222336
111	0.222336
111.1	0.262698
128	0.262698

## Sheet: Table S6
Table S6: δ13C output for Copra age model of sample SB_pk7497-1.
Age (Ka BP)	Age (yr BP)	δ13C (median)	Age: 2.5%-Quantile	Age: 97.5%-Quantile	δ13C: 2.5%-Quantile	δ13C: 97.5%-Quantile	Depth from top (mm)
0.142948	142.948	-0.2829	142.039	143.873	-0.2831	-0.2823	1
0.350908	350.908	-0.1281	349.267	352.602	-0.1291	-0.1277	2
0.574825	574.825	-0.2919	572.589	577.102	-0.2924	-0.2902	3
0.817438	817.438	-0.349	814.077	820.707	-0.3537	-0.3482	4
1.07587	1075.87	-0.7023	1070.63	1081.06	-0.7051	-0.6948	5
1.34705	1347.05	-0.1839	1339.34	1354.98	-0.2329	-0.1752	6
1.62791	1627.91	-2.2457	1617.54	1638.72	-2.2633	-2.1842	7
1.91536	1915.36	-1.2919	1901.74	1929.7	-1.3399	-1.2765	8
2.78662	2786.62	-0.3055	2762.39	2812.57	-0.3345	-0.2881	11
3.06976	3069.76	-0.1117	3042.49	3099.1	-0.129	-0.104	12
3.34414	3344.14	-0.3271	3314.18	3376.58	-0.3324	-0.3058	13
3.60668	3606.68	-0.2447	3573.77	3641.5	-0.2566	-0.2058	14
3.85432	3854.32	0.024	3819.39	3890.89	-0.071	0.0466	15
4.08397	4083.97	-0.7294	4047.98	4121.92	-0.7848	-0.6012	16
4.47706	4477.06	-1.3422	4440.91	4514.76	-1.3887	-1.2836	18
4.63928	4639.28	-1.5274	4603.75	4675.54	-1.5503	-1.443	19
4.79225	4792.25	-1.0825	4757.74	4827.44	-1.192	-1.0821	20
4.93748	4937.48	-1.0829	4903.91	4971.48	-1.0833	-1.0107	21
5.07559	5075.59	-0.7969	5042.15	5109.11	-0.8566	-0.784	22
5.33301	5333.01	-0.9508	5299.61	5367.15	-0.9612	-0.9193	24
5.45359	5453.59	-0.8086	5419.4	5489.51	-0.8537	-0.7513	25
5.56961	5569.61	-0.6172	5533.22	5607.51	-0.6786	-0.5793	26
5.6817	5681.7	-0.502	5643.25	5722.51	-0.5428	-0.4681	27
5.89663	5896.63	-0.321	5853.6	5943.17	-0.3549	-0.3157	29
6.10348	6103.48	-0.3589	6056.08	6154.7	-0.3871	-0.3484	31
6.20546	6205.46	-0.4179	6155.49	6258.56	-0.4879	-0.3878	32
6.30734	6307.34	-0.5182	6254.75	6362.9	-0.555	-0.3416	33
6.40975	6409.75	-0.1962	6355.89	6466.14	-0.3692	-0.1459	34
6.51333	6513.33	-0.3664	6459.04	6569.66	-0.3737	-0.248	35
6.61871	6618.71	-0.3609	6564.95	6674.52	-0.3708	-0.3575	36
6.72568	6725.68	-0.3712	6672.55	6780.95	-0.3834	-0.0617	37
6.83121	6831.21	0.2536	6778.33	6884.43	-0.0729	0.4729	38
6.9351	6935.1	0.69	6882.94	6986.73	0.4677	0.722	39
7.0375	7037.5	0.7443	6986.77	7087.72	0.721	0.7529	40
7.13857	7138.57	0.7065	7088.67	7187.88	0.5041	0.7301	41
7.23847	7238.47	0.2936	7190.02	7286.06	0.1966	0.4916	42
7.33734	7337.34	0.1343	7288.93	7384.03	0.0967	0.2364	43
7.43536	7435.36	0.3665	7387.87	7483.48	0.2401	0.3754	44
7.53267	7532.67	0.3527	7483.11	7581.64	0.2558	0.3642	45
7.62944	7629.44	0.2046	7580.06	7680.42	0.1644	0.3175	46
7.72582	7725.82	0.4583	7674.55	7778.38	0.299	0.5009	47
7.82197	7821.97	0.5359	7767.07	7877.16	0.4928	0.6293	48
7.91804	7918.04	0.6966	7860.01	7976.98	0.6016	1.0594	49
8.01419	8014.19	1.1036	7953.09	8076.89	0.507	1.2729	50
8.11058	8110.58	0.2537	8047.49	8174.5	0.0875	0.8669	51
8.20736	8207.36	0.6139	8142.87	8273.08	0.2613	0.7016	52
8.3047	8304.7	0.7441	8239.32	8371.64	0.6558	0.8511	53
8.40275	8402.75	0.8726	8337.74	8469.11	0.7944	0.9038	54
8.50118	8501.18	0.7838	8437.22	8567.01	0.6765	0.8656	55
8.59957	8599.57	0.635	8536.66	8664.37	0.6176	0.7281	56
8.69792	8697.92	0.6662	8636.68	8760.99	0.6341	0.9893	57
8.79622	8796.22	1.198	8737.35	8856.99	0.8623	1.255	58
8.89447	8894.47	1.2546	8838.06	8952.74	0.9519	1.2935	59
8.99268	8992.68	0.7835	8939.3	9047.89	0.6858	1.0383	60
9.09084	9090.84	1.1218	9041.26	9142.21	0.8962	1.153	61
9.18895	9188.95	1.0816	9143.2	9236.37	1.0621	1.1379	62
9.28701	9287.01	1.2309	9245.22	9330.35	1.1522	1.2829	63
9.38502	9385.02	1.3312	9346.47	9423.82	1.2433	1.3557	64
9.58089	9580.89	0.7934	9548.21	9613.03	0.7637	0.8635	66
9.67875	9678.75	0.9817	9647.53	9709.82	0.9194	0.9915	67
9.77655	9776.55	0.9452	9745.39	9807.56	0.9432	0.9586	68
9.8743	9874.3	0.9531	9840.92	9908.29	0.9498	0.9591	69
9.972	9972	0.9636	9935.44	10011.2	0.7629	0.9698	70
10.0696	10069.6	0.4558	10026.3	10114.1	0.4557	0.6759	71
118.727	118727	0.1719	118232	119224	-1.637	0.1793	72
119.224	119224	-1.4141	118795	119664	-2.9579	0.178	77
119.323	119323	-1.4561	118905	119764	-2.9661	-0.275	78
119.422	119422	-1.4561	119017	119849	-2.9842	-0.7397	79
119.621	119621	-1.1516	119232	120035	-2.8327	-0.7702	81
119.721	119721	-1.0466	119328	120128	-2.7093	-0.7161	82
119.82	119820	-0.9428	119433	120216	-2.69	-0.6711	83
120.019	120019	-0.8097	119643	120406	-2.4945	-0.634	85
120.218	120218	-0.7715	119837	120598	-1.5031	-0.6325	87
120.317	120317	-0.7999	119937	120701	-1.6783	-0.6286	88
120.417	120417	-0.8629	120035	120797	-1.7844	-0.6261	89
120.516	120516	-0.9081	120131	120897	-1.8173	-0.6295	90
120.715	120715	-1.3048	120324	121109	-1.8339	-0.635	92
121.013	121013	-1.2747	120601	121423	-1.7941	-0.9646	95
121.212	121212	-1.2795	120774	121638	-1.5288	-0.98	97
121.312	121312	-1.2705	120866	121746	-1.3802	-1.0045	98
121.411	121411	-1.2318	120959	121856	-1.3752	-1.037	99
121.51	121510	-1.1944	121052	121966	-1.3648	-1.1314	100
121.809	121809	-1.1835	121308	122294	-1.3191	-1.1326	103
122.007	122007	-1.1935	121482	122515	-1.2809	-1.1315	105
122.206	122206	-1.2011	121651	122733	-1.5824	-1.1309	107
122.703	122703	-1.2846	122071	123307	-3.1121	-1.1399	112
122.803	122803	-1.5289	122152	123421	-3.3334	-1.153	113
122.902	122902	-1.5772	122236	123537	-3.4648	-1.1777	114
123.002	123002	-1.7217	122317	123657	-3.5429	-1.1979	115
123.101	123101	-1.953	122398	123771	-3.5807	-1.221	116
123.201	123201	-2.1152	122475	123892	-3.6266	-1.2472	117
123.3	123300	-2.5816	122551	124006	-3.6312	-1.2707	118
123.399	123399	-2.9016	122634	124126	-3.6488	-1.3541	119
123.499	123499	-2.9888	122717	124240	-3.6491	-1.5273	120

## Sheet: Table S7
Table S7: Lev output for Copra age model of sample SB_pk7497-1.
Age (ka BP)	Age (yr BP)	Lev (median)	Age: 2.5%-Quantile	Age: 97.5%-Quantile	Lev: 2.5%-Quantile	Lev: 97.5%-Quantile	Depth from top (mm)
0.298739	298.739	1.5611	295.73	301.881	1.5611	1.5611	2
1.85421	1854.21	1.5611	1834.69	1873.65	1.5339	1.5611	7
2.14507	2145.07	1.1604	2121.87	2168.42	1.1602	1.1919	8
2.70094	2700.94	1.1602	2670.82	2730.76	1.1602	1.1716	10
2.96454	2964.54	1.2591	2931.41	2996.84	1.2472	1.2592	11
3.45956	3459.56	1.2592	3422.6	3495.31	1.2592	1.2697	13
3.68957	3689.57	1.324	3651.68	3726.69	1.3136	1.324	14
3.90699	3906.99	1.324	3868.32	3945.51	1.324	1.4398	15
4.1111	4111.1	1.9323	4072.13	4149.57	1.8181	1.9327	16
4.63834	4638.34	1.9327	4602.25	4675.15	1.7621	1.9327	19
4.7914	4791.4	1.2061	4756.31	4826.28	1.2054	1.3738	20
5.07493	5074.93	1.2057	5041.17	5107.22	1.2054	1.2929	22
5.33257	5332.57	1.8708	5299.21	5365.24	1.7871	1.8708	24
5.45328	5453.28	1.8704	5418.12	5487.08	1.8212	1.8708	25
5.56941	5569.41	1.7073	5533.8	5605.95	1.7073	1.7577	26
5.68161	5681.61	1.7073	5643.31	5720.96	1.7073	1.7206	27
5.89676	5896.76	1.7802	5852.92	5942.83	1.7651	1.7802	29
6.10379	6103.79	1.7801	6054.59	6155.19	1.699	1.7802	31
6.20585	6205.85	1.6138	6155.03	6259.75	1.6138	1.7	32
6.41022	6410.22	1.6137	6356.23	6466.95	1.5605	1.6138	34
6.51381	6513.81	1.5132	6458.46	6571.14	1.5132	1.5684	35
6.7261	6726.1	1.5136	6670.89	6782.38	1.5132	1.6274	37
6.83157	6831.57	1.7349	6777.85	6886.49	1.6171	1.7349	38
7.03766	7037.66	1.7352	6986.16	7088.72	1.7349	1.7916	40
7.1386	7138.6	1.8472	7087.25	7188.76	1.7907	1.8472	41
7.33709	7337.09	1.8482	7288.05	7384.82	1.8472	1.925	43
7.43496	7434.96	2.004	7386.59	7484.54	1.9262	2.004	44
7.62873	7628.73	2.0036	7577.5	7682.61	1.9742	2.004	46
7.72495	7724.95	1.9495	7671.52	7782.18	1.9495	1.9811	47
7.9169	7916.9	1.95	7857.73	7981.55	1.9495	1.9984	49
8.01293	8012.93	2.026	7950.33	8079.68	1.9741	2.026	50
8.20593	8205.93	2.0253	8138.17	8276.84	1.977	2.026	52
8.30321	8303.21	1.9568	8234.15	8374.85	1.9568	2.0073	53
8.49966	8499.66	1.9544	8432.06	8569.39	1.8009	1.9568	55
8.59806	8598.06	1.7267	8531.63	8666.48	1.7267	1.8884	56
8.79477	8794.77	1.7282	8732.57	8859.39	1.7267	1.9212	58
8.89308	8893.08	2.043	8833.48	8954.65	1.8392	2.043	59
9.0896	9089.6	2.043	9036.62	9143.96	2.043	2.055	61
9.18781	9187.81	2.0659	9137.94	9238.52	2.0536	2.0659	62
10.0699	10069.9	2.0659	10025.1	10115.2	2.0659	2.0687	71
118.826	118826	8.7953	118338	119335	5.8	8.8	73
119.125	119125	8.7056	118666	119597	5.8	8.8	76
119.225	119225	6.1	118772	119683	5.8	8.8	77
119.424	119424	5.8848	118986	119863	5.2392	8.8	79
119.524	119524	5.8024	119094	119954	4.8	8.8	80
119.623	119623	5.8	119198	120052	4.7819	7.9074	81
119.723	119723	5.3327	119307	120144	3.9621	6.1	82
119.823	119823	5.3	119412	120235	3.9	6.1	83
119.922	119922	4.9198	119515	120331	3.9	6.1	84
120.022	120022	4.8	119621	120427	3.9	6.0324	85
120.121	120121	4.8	119723	120526	3.9	5.9	86
120.221	120221	4.7005	119822	120622	3.8	5.9	87
120.321	120321	4.8	119918	120722	3.8	8.0849	88
120.42	120420	5.0547	120015	120818	3.8	8.6	89
120.52	120520	5.2861	120116	120918	3.8	8.6	90
120.62	120620	5.7	120217	121018	3.8	8.6	91
120.719	120719	5.9	120310	121118	3.8	8.6	92
120.819	120819	5.9852	120404	121221	3.8	8.6	93
120.918	120918	5.9588	120498	121331	3.8	8.6	94
121.018	121018	5.8952	120588	121443	4.1143	8.6	95
121.118	121118	5.8931	120678	121551	5.6	8.6	96
121.217	121217	5.8789	120766	121652	5.4633	8.6	97
121.317	121317	5.8584	120851	121760	5.1	8.0345	98
121.416	121416	5.8661	120936	121869	5.1	8.9056	99
121.516	121516	5.9088	121024	121977	5.1	9.7	100
121.616	121616	5.9442	121111	122085	5.1	9.7	101
121.715	121715	5.939	121199	122194	5.1	9.7	102
121.815	121815	5.9811	121287	122302	5.1	9.7	103
121.915	121915	5.9506	121373	122413	5.0072	9.7	104
122.014	122014	5.6	121460	122527	4.7099	9.7	105
122.114	122114	5.5928	121547	122640	4.7	9.7	106
122.213	122213	5.5551	121631	122754	4.7	9.7	107
122.313	122313	5.5229	121720	122869	4.7	9.7	108
122.413	122413	5.5	121806	122984	4.7	9.7	109
122.512	122512	5.383	121890	123096	4.7	9.5904	110
122.612	122612	5.3	121976	123213	4.7	6.9469	111
122.711	122711	5.3	122059	123331	4.7	5.6	112
122.811	122811	5.3	122147	123450	4.7	5.6	113
122.911	122911	5.3	122241	123570	4.7	5.6	114

## Sheet: Table S8
Table S8: SV output for Copra age model of sample SB_pk7497-1.
(Original standard deviation was used in Fig. 2 and is included here).
Age (ka BP)	Age (yr BP)	Proxy SV (median)	Original SD	Age: 2.5%-Quantile	Age: 97.5%-Quantile	Proxy SV: 2.5%-Quantile	Proxy SV: 97.5%-Quantile	Depth from top (mm)
0.298736	298.736	0.66	0.0626536	295.57	301.637	0.66	0.66	2
2.96481	2964.81	1	0.164913	2931.57	2998.02	0.66	1	11
4.30162	4301.62	0.5315	0.0617767	4262.22	4340.75	0.53	1	17
5.20717	5207.17	1.1135	0.0596319	5173.81	5239.42	0.53	1.12	23
5.89733	5897.33	1.1396	0.352596	5852.67	5941.64	1.12	1.14	29
6.51446	6514.46	0.9	0.0723962	6460.32	6570.93	0.9	1.14	35
7.13941	7139.41	0.61	0.0658482	7092.2	7188.18	0.61	0.9	41
7.72595	7725.95	0.9497	0.239834	7671.86	7779.47	0.61	0.95	47
8.30435	8304.35	0.59	0.0370258	8234.61	8373.44	0.59	0.95	53
8.89425	8894.25	0.7261	0.146277	8833.33	8954.65	0.59	0.73	59
9.48335	9483.35	0.73	0.146277	9444.31	9520.32	0.73	0.73	65
118.829	118829	0.7	0.174713	118322	119341	0.7	0.7001	73
119.426	119426	0.7	0.174713	118998	119854	0.6	0.7	79
119.923	119923	0.7	0.174713	119534	120312	0.6	1.7	84
120.222	120222	0.8	0.153126	119825	120610	0.6	1.7	87
120.62	120620	0.8	0.153126	120220	121006	0.5	1.7	91
121.018	121018	1.3	0.218939	120582	121432	0.5	1.7	95
121.416	121416	0.7	0.102958	120953	121869	0.5	1.7	99
121.814	121814	1.1	0.174866	121305	122304	0.5	1.3	103
122.212	122212	1.1	0.174866	121658	122755	0.7	1.3	107
122.61	122610	1.1	0.174866	121997	123214	0.7	1.3	111
124.302	124302	1.3	0.179651	123408	125199	1.3	1.3	128

## Sheet: Table S9
Table S9: CV output for Copra age model of sample SB_pk7497-1.
(Original standard deviation was used in Fig. 2 and is included here).
Age (ka BP)	Age (yr BP)	Proxy CV (median)	Original SD	Age: 2.5%-Quantile	Age: 97.5%-Quantile	Proxy CV: 2.5%-Quantile	Proxy CV: 97.5%-Quantile	Depth from top (mm)
0.298652	298.652	0.09	0.0030306	295.55	301.659	0.09	0.09	2
2.96524	2965.24	0.12	0.00966101	2933.72	2996.65	0.09	0.12	11
4.30225	4302.25	0.1	0.0054514	4265.06	4340.16	0.1	0.12	17
5.20792	5207.92	0.14	0.00689582	5175.83	5241.21	0.1	0.14	23
5.8982	5898.2	0.19	0.00854946	5854.69	5942.75	0.14	0.19	29
6.51523	6515.23	0.1334	0.00503588	6459.12	6571.03	0.13	0.19	35
7.13962	7139.62	0.1399	0.00716188	7091.1	7189.31	0.13	0.14	41
7.72531	7725.31	0.19	0.010887	7672.38	7780.54	0.14	0.19	47
8.30307	8303.07	0.1425	0.00576656	8232.99	8372.95	0.14	0.19	53
8.89288	8892.88	0.1498	0.00576656	8829.29	8954.06	0.14	0.15	59
9.48223	9482.23	0.15	0.00576656	9444.53	9518.87	0.15	0.15	65
118.828	118828	0.2	0.0597096	118312	119348	0.1998	0.2	73
119.426	119426	0.2528	0.0597096	118990	119872	0.2	0.3	79
119.924	119924	0.3	0.0745649	119521	120340	0.3	1	84
120.223	120223	0.3	0.0745649	119838	120617	0.3	1	87
120.622	120622	0.3	0.0745649	120229	121020	0.1	0.6382	91
121.021	121021	0.3	0.0745649	120601	121434	0.1	0.7	95
121.419	121419	0.3	0.0745649	120969	121864	0.1	1	99
121.818	121818	0.7	0.117294	121327	122307	0.1	1	103
122.216	122216	0.7	0.117294	121663	122763	0.2	1	107
122.615	122615	0.3	0.0371951	121994	123218	0.2	1	111
124.309	124309	0.3	0.0371951	123390	125201	0.3	0.3	128

## Sheet: Table S10
Table S10: The normalisation equations for Levoglucosan.
Age Holocene (ka BP)	Lev (median)	Holocene Norm	Age LIG (ka BP)	Lev (median)	LIG Norm			Holocene					LIG
0.298739	1.5611	0.755651	118.826	8.7953	1			x-max	2.0659				x-max	8.7953
1.85421	1.5611	0.755651	119.125	8.7056	0.989801			x-min	1.1602				x-min	4.7005
2.14507	1.1604	0.561692	119.225	6.1	0.693552			x-max-x-min	0.9057				x-max-x-min	4.0948
2.70094	1.1602	0.561595	119.424	5.8848	0.669085
2.96454	1.2591	0.609468	119.524	5.8024	0.659716
3.45956	1.2592	0.609516	119.623	5.8	0.659443
3.68957	1.324	0.640883	119.723	5.3327	0.606312
3.90699	1.324	0.640883	119.823	5.3	0.602595
4.1111	1.9323	0.935331	119.922	4.9198	0.559367
4.63834	1.9327	0.935524	120.022	4.8	0.545746
4.7914	1.2061	0.583813	120.121	4.8	0.545746
5.07493	1.2057	0.58362	120.221	4.7005	0.534433
5.33257	1.8708	0.905562	120.321	4.8	0.545746
5.45328	1.8704	0.905368	120.42	5.0547	0.574705
5.56941	1.7073	0.826419	120.52	5.2861	0.601014
5.68161	1.7073	0.826419	120.62	5.7	0.648073
5.89676	1.7802	0.861707	120.719	5.9	0.670813
6.10379	1.7801	0.861658	120.819	5.9852	0.6805
6.20585	1.6138	0.781161	120.918	5.9588	0.677498
6.41022	1.6137	0.781112	121.018	5.8952	0.670267
6.51381	1.5132	0.732465	121.118	5.8931	0.670028
6.7261	1.5136	0.732659	121.217	5.8789	0.668414
6.83157	1.7349	0.839779	121.317	5.8584	0.666083
7.03766	1.7352	0.839924	121.416	5.8661	0.666958
7.1386	1.8472	0.894138	121.516	5.9088	0.671813
7.33709	1.8482	0.894622	121.616	5.9442	0.675838
7.43496	2.004	0.970037	121.715	5.939	0.675247
7.62873	2.0036	0.969844	121.815	5.9811	0.680034
7.72495	1.9495	0.943657	121.915	5.9506	0.676566
7.9169	1.95	0.943899	122.014	5.6	0.636704
8.01293	2.026	0.980686	122.114	5.5928	0.635885
8.20593	2.0253	0.980348	122.213	5.5551	0.631599
8.30321	1.9568	0.94719	122.313	5.5229	0.627938
8.49966	1.9544	0.946028	122.413	5.5	0.625334
8.59806	1.7267	0.83581	122.512	5.383	0.612031
8.79477	1.7282	0.836536	122.612	5.3	0.602595
8.89308	2.043	0.988915	122.711	5.3	0.602595
9.0896	2.043	0.988915	122.811	5.3	0.602595
9.18781	2.0659	1	122.911	5.3	0.602595
10.0699	2.0659	1

[truncated: 10 more sheets: Table S11, Figure 1, Figure 2, Figure 3, Figure 4, Figure 5, Figure 6, Figure A1, Figure B1, Figure C1]
